# Supplementary material for: Virome analyses of Hevea brasiliensis using small RNA deep sequencing and PCR techniques reveal the presence of a potential new virus
Source: Springer Nature journal article supplement (doi:10.1186/s12985-018-1095-3), 2018-11-26

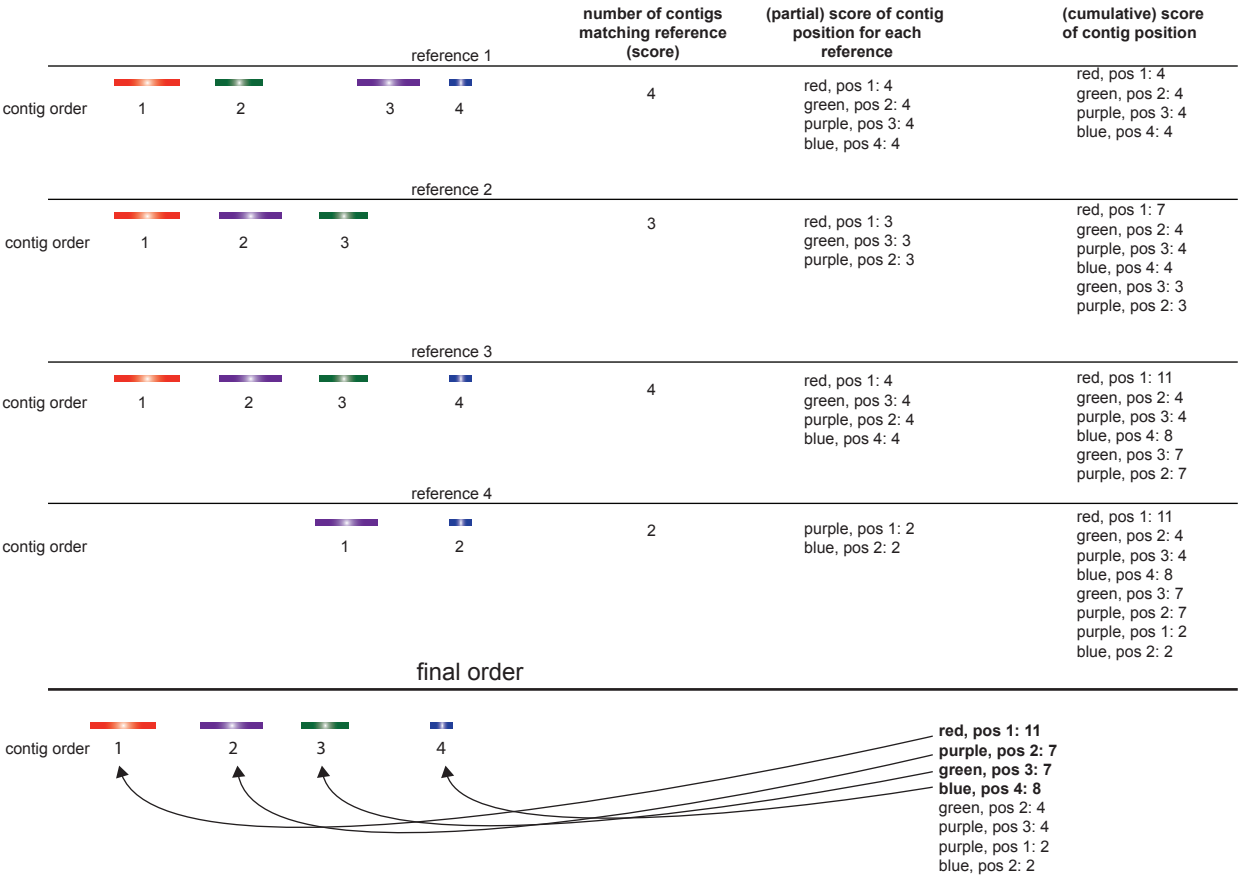

Supplement: MOESM1 [file 16295752]
