# Supplementary material for: Virome analyses of Hevea brasiliensis using small RNA deep sequencing and PCR techniques reveal the presence of a potential new virus
Source: Springer Nature journal article supplement (doi:10.1186/s12985-018-1095-3), 2018-11-26
Supplement: MOESM4 [file 16295752]

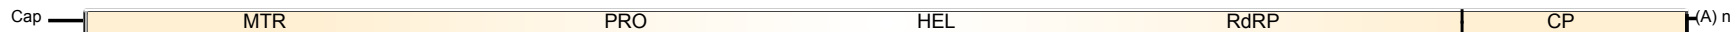

E-value:  
■  $1e-2 < x < 1e-5$  ■  $1e-5 < x < 1e-10$  ■  $x < 1e-10$

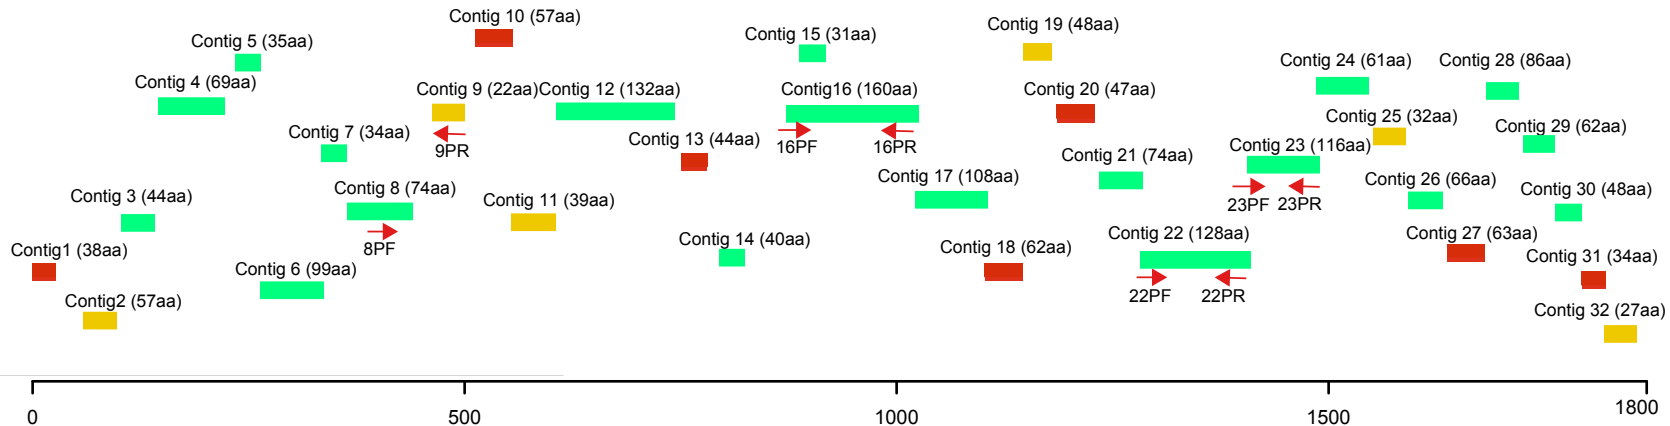

Grapevine fleck virus (GFkV) (aa)
